# Supplementary material for: The Prevalence of Bowel and Bladder Function During Early Childhood: A Population-Based Study
Source: PubMed Central journal article supplement (PMC10259211; doi:10.1097/mpg.0000000000003804), 2023-04-25
Supplement: mpg-77-47-s001.pdf [file mpg-77-47-s001.pdf]

## Supplemental Digital Content 1. Sample size calculation

The estimated prevalence from previous studies was around 8% ( $P = 0.08$ ).<sup>(1,2,6-11)</sup>

We aimed for a 95% level of confidence ( $Z = 1.96$ ) and the precision corresponding to the effect size ( $d = 0.08 / 4 = 0.02$ ).

In this way, the sample size (N) was calculated as:<sup>(16,17)</sup>

$$(Z^2 P(1-P)) / d^2 =$$

$$(1.962 \cdot 0.08(1-0.08)) / 0.0004 =$$

$$(3.8416 \cdot 0.0736) / 0.0004 = 706,8544.$$
