# Supplementary material for: The Prevalence of Bowel and Bladder Function During Early Childhood: A Population-Based Study
Source: PubMed Central journal article supplement (PMC10259211; doi:10.1097/mpg.0000000000003804), 2023-04-25
Supplement: mpg-77-47-s002.pdf [file mpg-77-47-s002.pdf]

## Supplemental Digital Content 2. Characteristics of the included children

|                                 | n (%)       |
|---------------------------------|-------------|
| <b>Overall</b>                  | 791 (100.0) |
| <b>Sex</b>                      |             |
| Boys                            | 432 (54.6)  |
| Girls                           | 359 (45.4)  |
| <b>Age (years)</b>              |             |
| 0                               | 49 (6.2)    |
| 1                               | 104 (13.1)  |
| 2                               | 84 (10.6)   |
| 3                               | 101 (12.8)  |
| 4                               | 103 (13.0)  |
| 5                               | 114 (14.4)  |
| 6                               | 125 (15.8)  |
| 7                               | 111 (14.0)  |
| <b>Classification of weight</b> |             |
| Underweight                     | 83 (10.5)   |
| Normal weight                   | 528 (66.8)  |
| Overweight                      | 85 (10.7)   |
| Obese                           | 95 (12.0)   |
| <b>Preterm birth</b>            | 76 (9.6)    |
