# Supplementary material for: The Prevalence of Bowel and Bladder Function During Early Childhood: A Population-Based Study
Source: PubMed Central journal article supplement (PMC10259211; doi:10.1097/mpg.0000000000003804), 2023-04-25

**A.**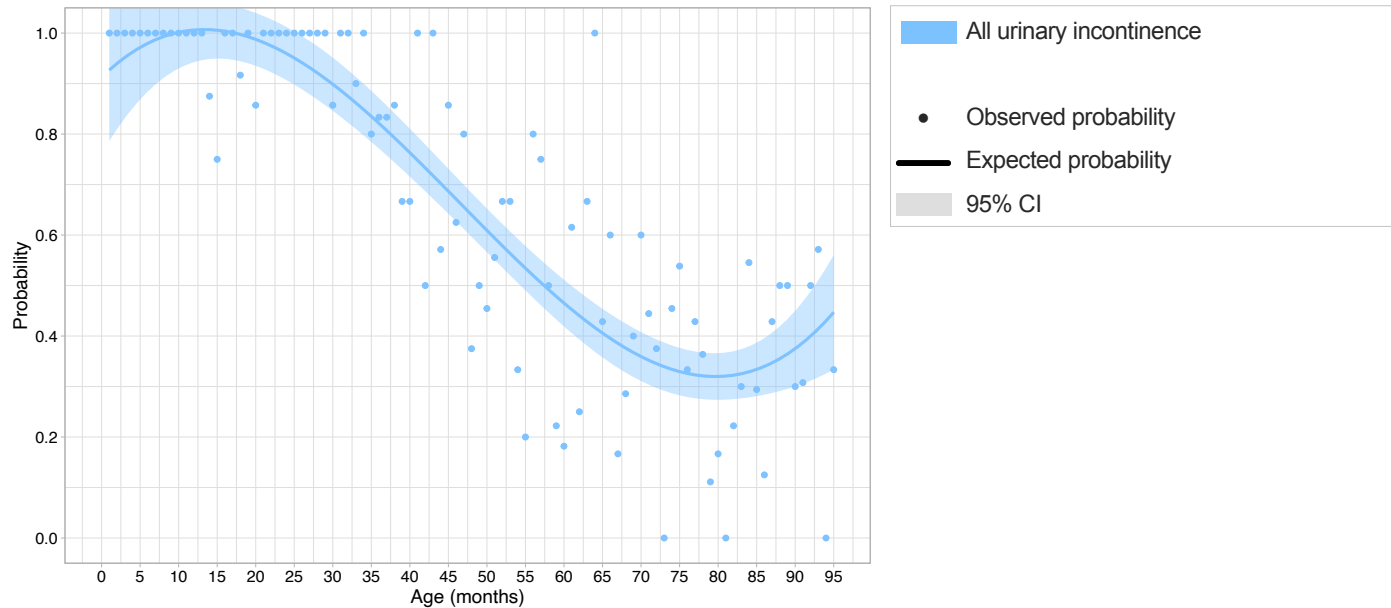**B.**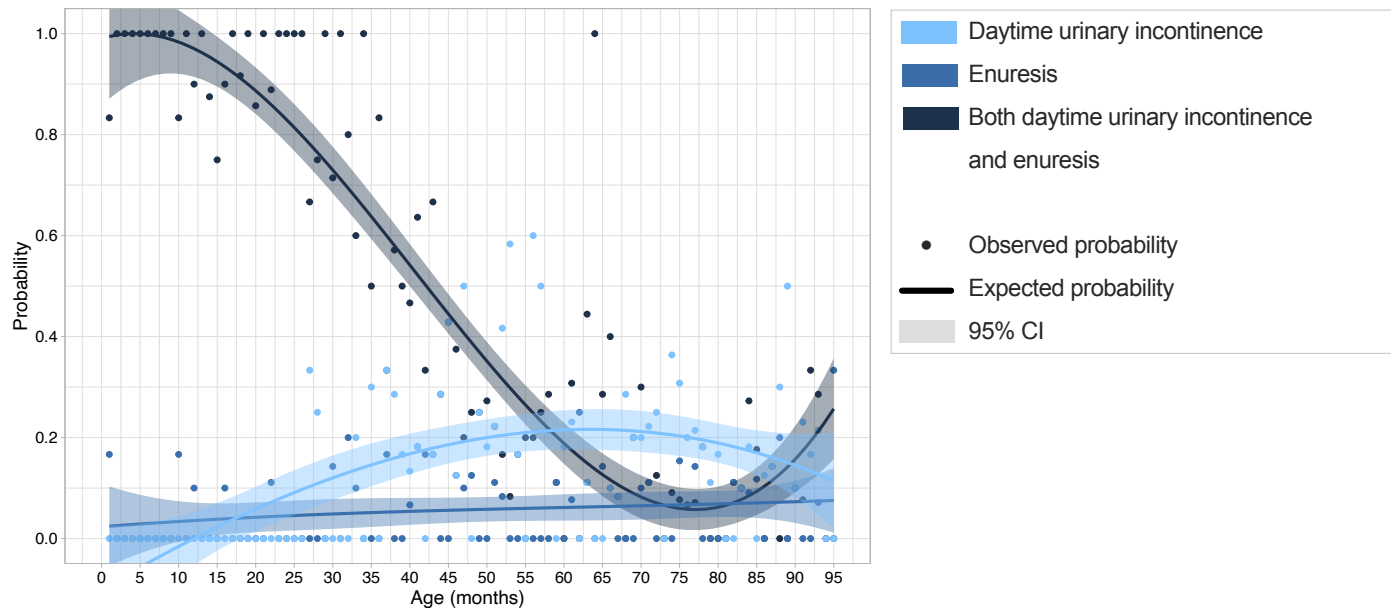

Supplement: mpg-77-47-s005.pdf [file mpg-77-47-s005.pdf]
